# Supplementary material for: Patient experiences of primary care quality amongst different types of health care facilities in central Vietnam
Source: Springer Nature journal article supplement (doi:10.1186/s12913-019-4089-y), 2019-05-02
Supplement: MOESM1 [file 16692018]

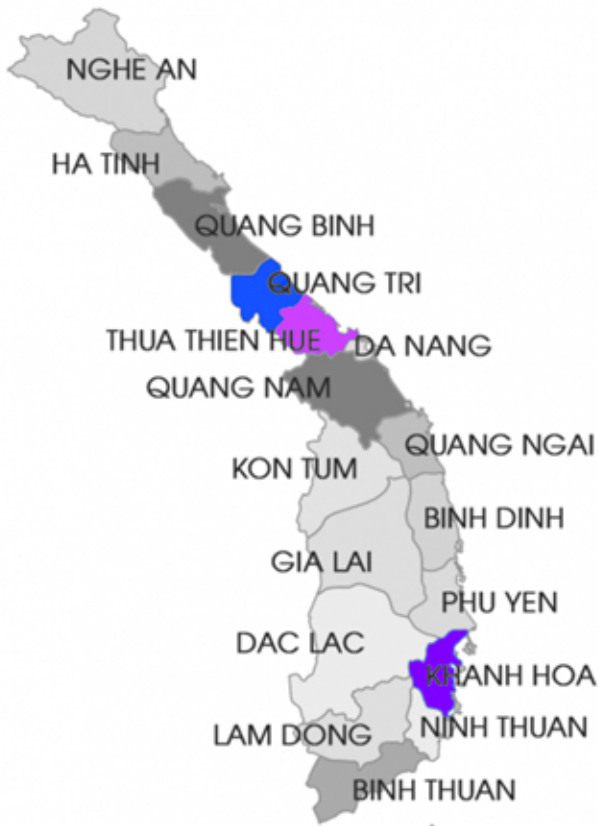

**PROVINCES OF CENTRAL VIETNAM**

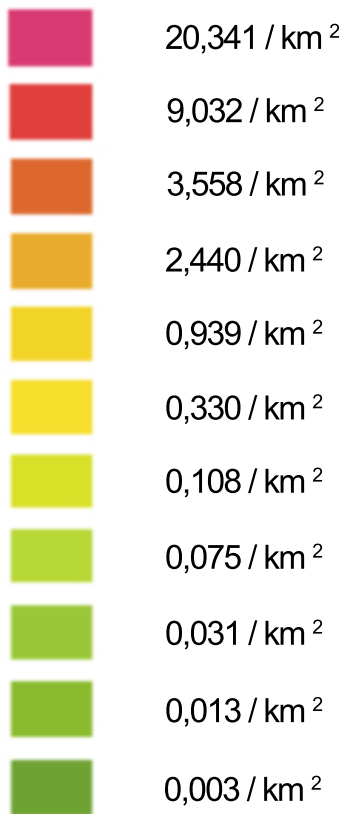

**DENSITY OF POPULATION**

**NOTE: THE BLACK SPOTS ● INDICATE THE SELECTED COMMUNES**

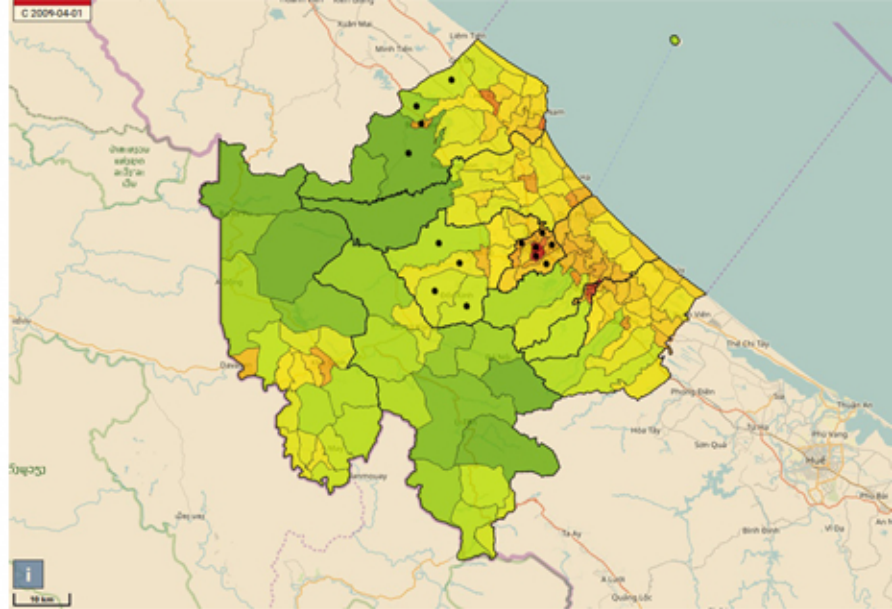

**POPULATION MAP OF QUANG TRI PROVINCE**

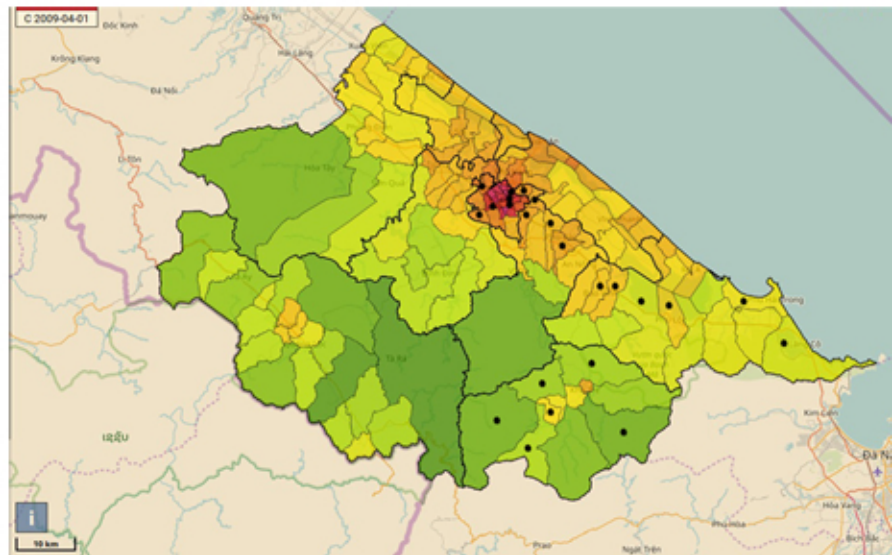

**POPULATION MAP OF THUA THIEN HUE PROVINCE**

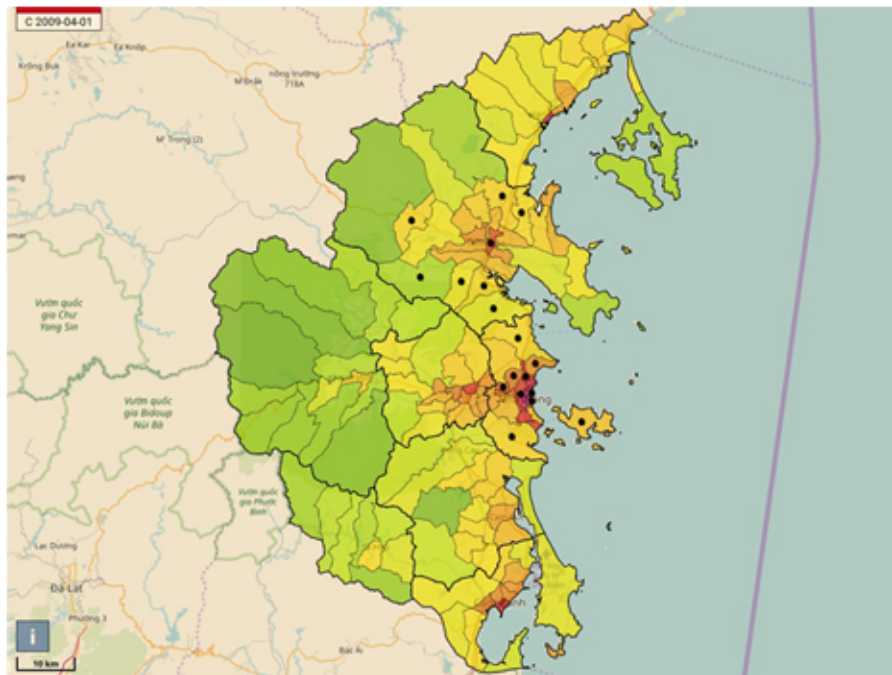

**POPULATION MAP OF KHAMH HOA PROVINCE**

**Figure. Population density of study area.**

Data was extracted from: <https://www.citypopulation.de/>
